# Supplementary material for: Efficient second-order nonlinear response and upconversion emission from a wide-bandgap quasi-1D lead bromide perovskite
Source: Royal Society of Chemistry journal article supplement (doi:10.1039/d2tc02917k), 2022-01-01
Supplement: d2tc02917k1.pdf [file d2tc02917k1.pdf]

## Supporting Information

### Efficient Second-Order Nonlinear Response and Upconversion Emission from Wide-Bandgap Quasi-1D Lead Bromide Perovskite

Yun-ke Zhou<sup>a</sup>, Wanning Li<sup>b</sup>, Xiao-mei Chen<sup>a</sup>, Xiao-Ze Li<sup>a</sup>, Xiao-Jie Wang<sup>a</sup>, Benfeng Bai<sup>\*a</sup>, Yu Chen<sup>\*b</sup>, Hong-Hua Fang<sup>\*a</sup>

---

<sup>a</sup> State Key Laboratory of Precision Measurement Technology and Instruments, Department of Precision Instrument, Tsinghua University, Beijing 100084, P. R. China. E-mail: [hfang@mail.tsinghua.edu.cn](mailto:hfang@mail.tsinghua.edu.cn), [baibenfeng@tsinghua.edu.cn](mailto:baibenfeng@tsinghua.edu.cn)

<sup>b</sup> MIIT Key Laboratory for Low-Dimensional Quantum Structure and Devices, School of Materials Science and Engineering, Beijing Institute of Technology, Beijing 100081, P. R. China. E-mail: [chenyubit@bit.edu.cn](mailto:chenyubit@bit.edu.cn).

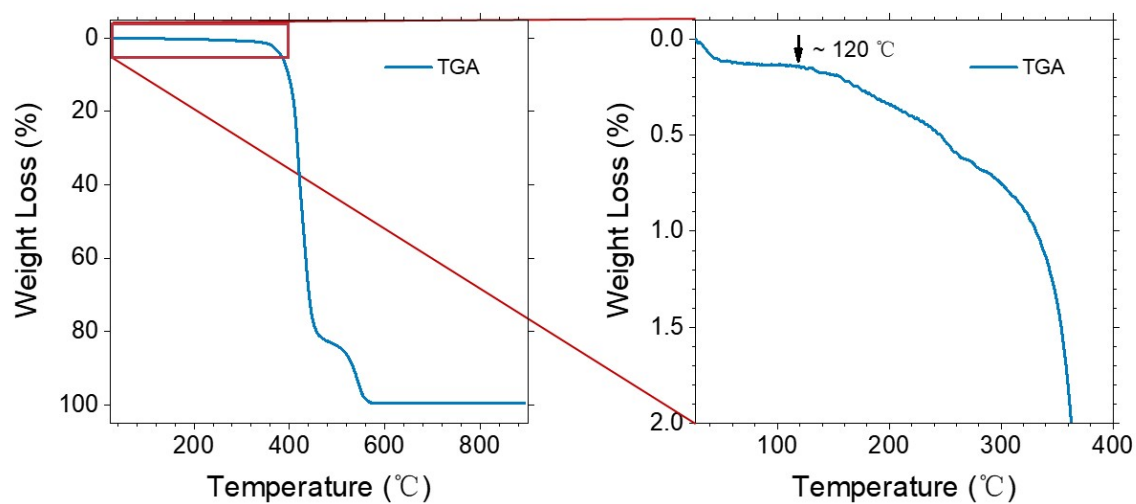

Figure S1. Left panel: Thermal gravimetric analysis (TGA) plots for  $\text{PEA}_3\text{PbBr}_5 \cdot \text{H}_2\text{O}$  crystals. Right panel: The corresponding region as marked with a red rectangular.

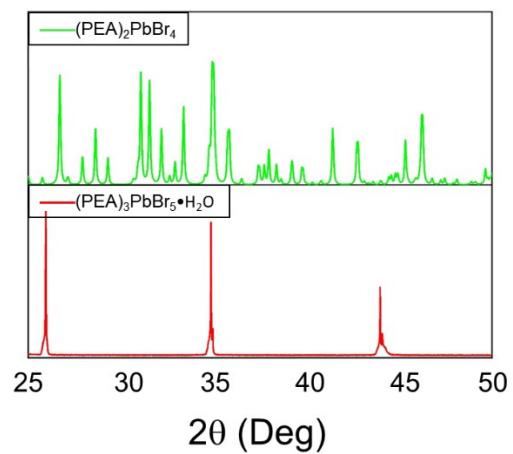

Figure S2. Simulated XRD patterns of  $\text{PEA}_3\text{PbBr}_5 \cdot \text{H}_2\text{O}$  and  $\text{PEA}_2\text{PbBr}_4$  crystals.

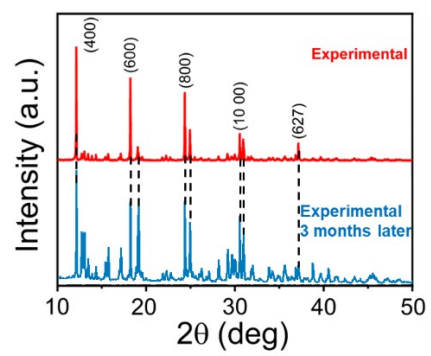

Figure S3. Comparison of measured powder X-ray diffraction (PXRD) diagram of PEA3PbBr5 crystals over three months.

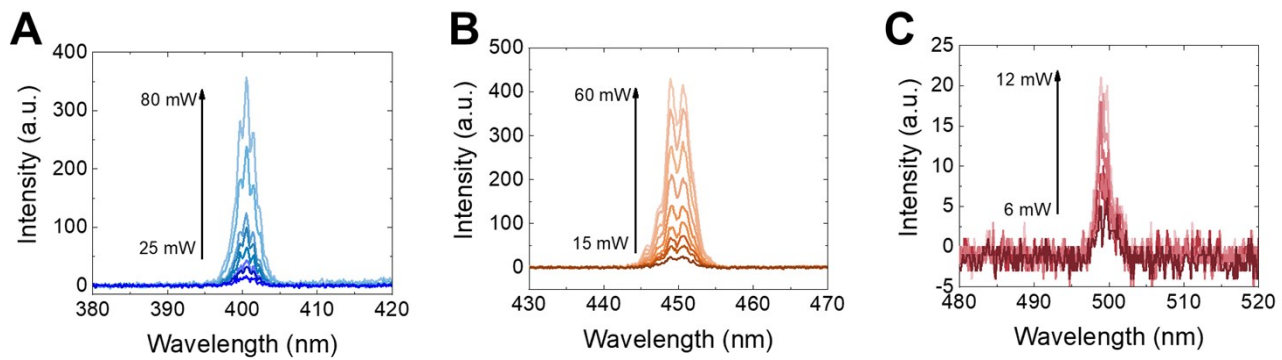

Figure S4. The power-dependent SHG plots excited at different wavelengths, A) 800 nm, B) 900nm, and C) 1000 nm.

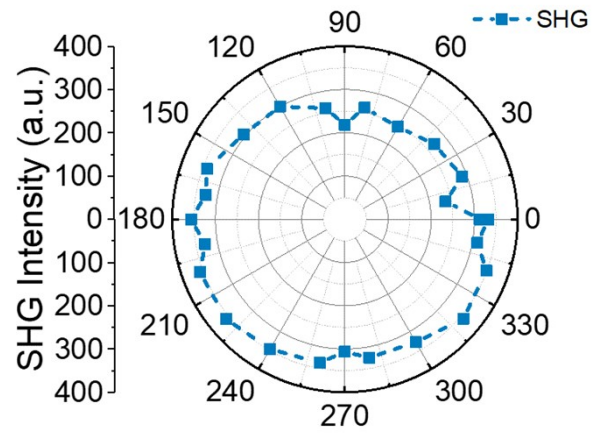

Figure S5. Polar plot of SHG intensity as a function of excitation polarization angle  $\theta$ .

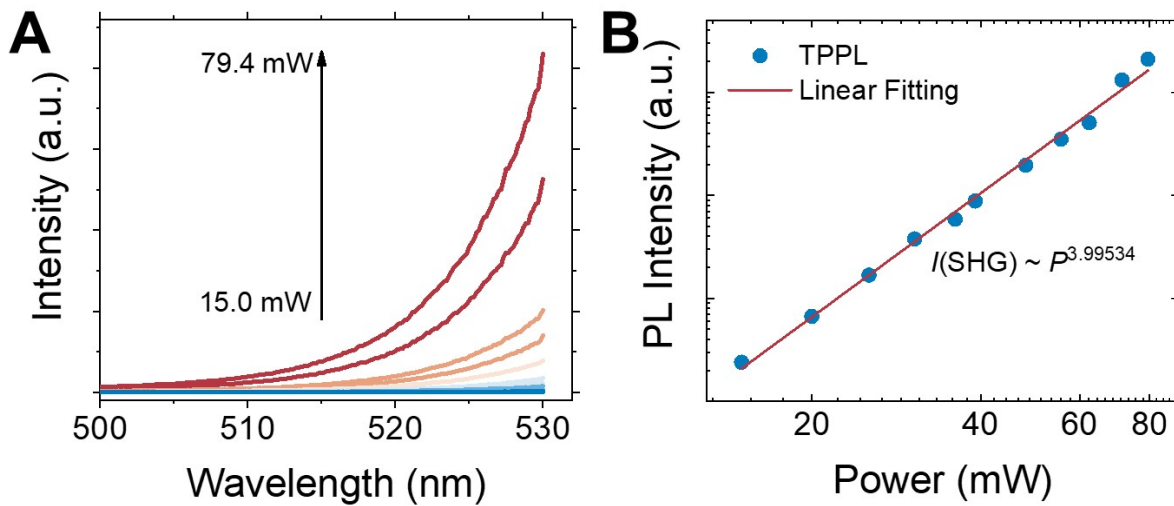

Figure S6. A) Power-dependent TPPL spectra at the excitation wavelength 800 nm with various power from 15.0 mW to 79.4 mW. B) Logarithmic diagrams of the power-dependent TPPL intensity corresponding to the spectra in A).

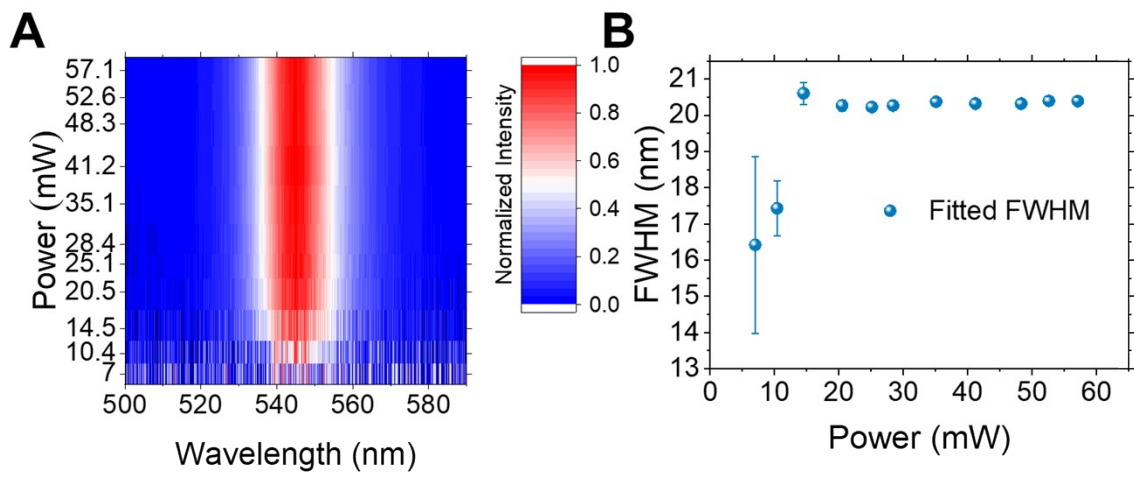

Figure S7. A) Normalized spectral- and power-dependent PL images at the excitation wavelength of 900 nm with various power from 7 mW to 57.1 mW. B) Gaussian fitted full-width of half maximum (FWHM) as a function of power density.



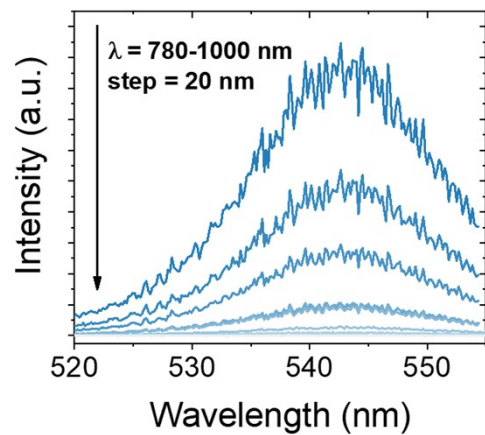

Figure S8. Wavelength-dependent TPPL spectra at the excitation wavelength varying from 780 to 1040 nm with a step of 20 nm.

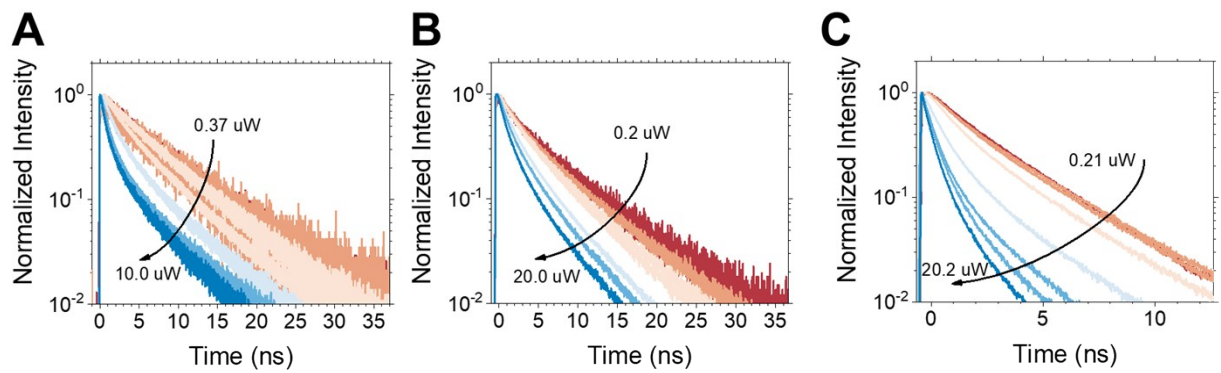

Figure S9. A-C) Excitation power-dependent PL dynamics at different positions excited by a femtosecond pulsed laser at 400 nm.

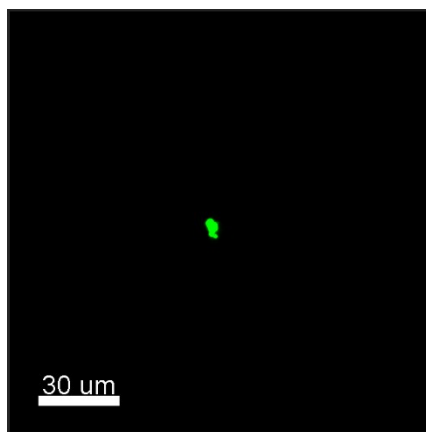

Figure S10. Photoluminescence image with wide-field UV (330 nm - 380 nm) LED illumination.  
Scale bar: 30  $\mu\text{m}$ .

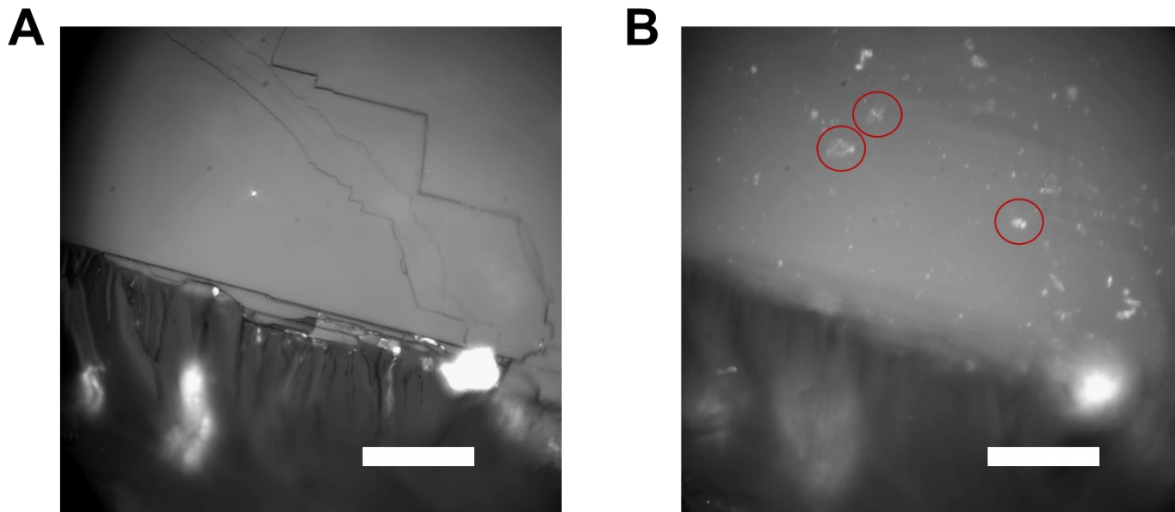

Figure S11. A-B) Photograph of the PEA<sub>3</sub>PbBr<sub>5</sub>·H<sub>2</sub>O single-crystal captured by a monochrome CMOS camera with wide-field blue LED illumination. A) Surface. B) Interior. Scale bar: 20  $\mu$ m.

Table S1: Crystallographic data for PEA<sub>3</sub>PbBr<sub>5</sub>·H<sub>2</sub>O single-crystal.

| Formula                                      | (PEA) <sub>3</sub> PbBr <sub>5</sub> ·H <sub>2</sub> O |
|----------------------------------------------|--------------------------------------------------------|
| Formula weight                               | 987.7                                                  |
| Temperature (K)                              | Room temperature (296)                                 |
| Crystal system                               | monoclinic                                             |
| Space group                                  | C2/c                                                   |
| a (Å)                                        | 29.269(3)                                              |
| b (Å)                                        | 8.1369(7)                                              |
| c (Å)                                        | 27.879(2)                                              |
| $\alpha$                                     | 90.0000                                                |
| $\beta$                                      | 92.448(2)                                              |
| $\gamma$                                     | 90.0000                                                |
| Unit-cell volume (Å <sup>3</sup> )           | 6633.6 (10)                                            |
| Z                                            | 8                                                      |
| Z'                                           | 1                                                      |
| Density (calculated) / (g·cm <sup>-3</sup> ) | 1.985                                                  |
| F000                                         | 3744                                                   |
| $\mu$ (mm <sup>-1</sup> )                    | 11.130                                                 |
| Wavelength (Å)                               | 0.71073                                                |
| Data completeness                            | 0.991                                                  |
| R (reflections)                              | 0.0372 (3843)                                          |
| wR2 (reflections)                            | 0.1108 (5822)                                          |
| S                                            | 0.836                                                  |

Table S2: Comparison of second-order nonlinear behavior of lead halide perovskites.

| Composition                                                                          | Morphology      | Optical gap<br>(eV) | $\lambda$ (nm) | $\chi^{(2)}$<br>(pm/V) | Ref       |
|--------------------------------------------------------------------------------------|-----------------|---------------------|----------------|------------------------|-----------|
| PEA <sub>3</sub> PbBr <sub>5</sub> ·H <sub>2</sub> O                                 | Single crystals | 4.20                | 900            | 0.1                    | This work |
| (R-MPEA) <sub>1.5</sub> PbBr <sub>3.5</sub> (DMSO) <sub>0.5</sub>                    | Nanowires       | 3.07                | 850            | 0.68                   | 1         |
| (PMA) <sub>2</sub> PbCl <sub>4</sub>                                                 | Single crystals | 3.65                | 1550           | 1.4                    | 2         |
| (C <sub>5</sub> H <sub>13</sub> N <sub>2</sub> ) PbCl <sub>4</sub> ·H <sub>2</sub> O | Single crystals | 3.80                | 1064           | 0.32                   | 3         |
| (2-FBA) <sub>2</sub> PbCl <sub>4</sub>                                               | Single crystals | 3.62                | 1064           | 0.35                   | 4         |

## References

1. C. Yuan, X. Li, S. Semin, Y. Feng, T. Rasing and J. Xu, *Nano Lett.*, 2018, 18, 5411-5417.
2. Y. Gao, G. Walters, Y. Qin, B. Chen, Y. Min, A. Seifitokaldani, B. Sun, P. Todorovic, M. I. Saidaminov, A. Lough, S. Tongay, S. Hoogland and E. H. Sargent, *Adv. Mater.*, 2019, 31, e1808336.
3. Y. Peng, Y. Yao, L. Li, Z. Wu, S. Wang and J. Luo, *J. Mater. Chem. C*, 2018, 6, 6033-6037.
4. P. P. Shi, S. Q. Lu, X. J. Song, X. G. Chen, W. Q. Liao, P. F. Li, Y. Y. Tang and R. G. Xiong, *J. Am. Chem. Soc.*, 2019, 141, 18334-18340.
